# Supplementary material
Source: PubMed Central journal article supplement (PMC8506961)

LIAISON® SARS-CoV-2 S1/S2 IgG, AU/mL

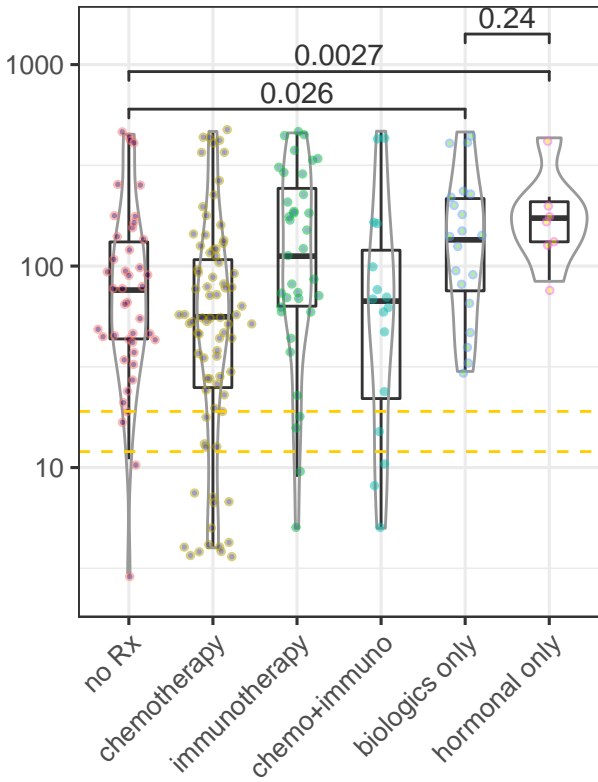

Supplement: mmc1.pdf [file mmc1.pdf]
